# Supplementary material for: Targeted Therapy Modulates the Secretome of Cancer-Associated Fibroblasts to Induce Resistance in HER2-Positive Breast Cancer
Source: MDPI journal article supplement (doi:10.3390/ijms222413297), 2021-12-10
Supplement: s1 [file s1]

| <b>Cytokine</b>      | <b>Gene name</b>      | <b>Position</b> |
|----------------------|-----------------------|-----------------|
| Angiogenin           | ANG                   | 11D             |
| BDNF                 | BDNF                  | 6E              |
| BLC (CXCL13)         | CXCL13                | 7E              |
| Ck beta 8-1 (CCL23)  | CCL23                 | 8E              |
| EGF                  | EGF                   | 9D              |
| ENA-78 (CXCL5)       | CXCL5                 | 7A              |
| Eotaxin-1 (CCL11)    | CCL11                 | 9E              |
| Eotaxin-2 (CCL24)    | CCL24                 | 10E             |
| Eotaxin-3 (CCL26)    | CCL26                 | 11E             |
| FGF-4                | FGF4                  | 1F              |
| FGF-6                | FGF6                  | 2F              |
| FGF-7 (KGF)          | FGF7                  | 3F              |
| FGF-9                | FGF9                  | 4F              |
| FLT-3 Ligand         | FLT3LG                | 5F              |
| Fractalkine (CX3CL1) | CX3CL1                | 6F              |
| G-CSF                | CSF3                  | 8A              |
| GDNF                 | GDNF                  | 8F              |
| GM-CSF               | CSF2                  | 9A              |
| GPC-2 (CXCL6)        | CXCL6                 | 7F              |
| GRO a/b/g            | CXCL1 / CXCL2 / CXCL3 | 10A             |
| GRO alpha (CXCL1)    | CXCL1                 | 11A             |
| HGF                  | HGF                   | 9F              |
| I-309 (CCL1)         | CCL1                  | 1B              |
| IFN-gamma            | IFNG                  | 4C              |
| IGF-1                | IGF1                  | 10D             |
| IGFBP-1              | IGFBP1                | 10F             |
| IGFBP-2              | IGFBP2                | 11F             |
| IGFBP-3              | IGFBP3                | 1G              |
| IGFBP-4              | IGFBP4                | 2G              |
| IL-1 alpha (IL-1 F1) | IL1A                  | 2B              |
| IL-1 beta (IL-1 F2)  | IL1B                  | 3B              |
| IL-10                | IL10                  | 11B             |
| IL-12 (p40/p70)      | IL12 (IL12B / IL12A)  | 1C              |
| IL-13                | IL13                  | 2C              |
| IL-15                | IL15                  | 3C              |
| IL-16                | IL16                  | 3G              |
| IL-2                 | IL2                   | 4B              |
| IL-3                 | IL3                   | 5B              |
| IL-4                 | IL4                   | 6B              |
| IL-5                 | IL5                   | 7B              |

| <b>Cytokine</b>      | <b>Gene name</b> | <b>Position</b> |
|----------------------|------------------|-----------------|
| IL-6                 | IL6              | 8B              |
| IL-7                 | IL7              | 9B              |
| IL-8 (CXCL8)         | CXCL8            | 10B             |
| IP-10 (CXCL10)       | CXCL10           | 4G              |
| Leptina              | LEP              | 5E              |
| LIF                  | LIF              | 5G              |
| LIGHT (TNFSF14)      | TNFSF14          | 6G              |
| MCP-1 (CCL2)         | CCL2             | 5C              |
| MCP-2 (CCL8)         | CCL8             | 6C              |
| MCP-3 (CCL7)         | CCL7             | 7C              |
| MCP-4 (CCL13)        | CCL13            | 7G              |
| M-CSF                | CSF1             | 8C              |
| MDC (CCL22)          | CCL22            | 9C              |
| MIF                  | MIF              | 8G              |
| MIG (CXCL9)          | CXCL9            | 10C             |
| MIP-1 beta (CCL4)    | CCL4             | 11C             |
| MIP-1 delta          | CCL15            | 1D              |
| MIP-3 alpha (CCL20)  | CCL20            | 9G              |
| NAP-2 (CXCL7)        | CXCL7            | 10G             |
| NT-3                 | NTF3             | 11G             |
| NT-4                 | NTF4             | 1H              |
| OPG (TNFR SF 11)     | TNFRSF11B        | 3H              |
| OPN (SSP1)           | SSP1             | 2H              |
| OSM                  | OSM              | 1E              |
| PARC                 | CCL18            | 4H              |
| PDGF-BB              | PDGFB            | 4E              |
| PLGF                 | PGF              | 5H              |
| RANTES (CCL5)        | CCL5             | 2D              |
| SCF                  | KITLG (SCF)      | 3D              |
| SDF-1 alpha          | CXCL12           | 4D              |
| TARC (CCL17)         | CCL17            | 5D              |
| TGF beta 1           | TGFB1            | 6D              |
| TGF beta 2           | TGFB2            | 6H              |
| TGF beta 3           | TGFB3            | 7H              |
| TIMP-1               | TIMP1            | 8H              |
| TIMP-2               | TIMP2            | 9H              |
| TNF alpha            | TNFA             | 7D              |
| TNF beta (TNF SF 1B) | LTA (TNFB)       | 8D              |
| TPO                  | TPO              | 2E              |
| VEGF-A               | VEGFA            | 3E              |

**Supplementary Table S1. Map and antibody list.** List of 80 cytokines analysed in the array and their positions.

| <b>GO biological process</b>                                      | <b>cytokine count</b> | <b>mapped ID</b>                                                                                | <b>genes</b> | <b>fold enrichment</b> | <b>FDR</b> |
|-------------------------------------------------------------------|-----------------------|-------------------------------------------------------------------------------------------------|--------------|------------------------|------------|
| regulation of immune system process<br>(GO:0002682)               | 16                    | CCL2, CCL20, CCL4, CCL7, CCL8, CSF1, CXCL10, IGF1, IL5, IL7, LIF, MIF, TGFB1, TGFB2, THPO, TNFA | 1701         | 7.45                   | 2.53E-09   |
| positive regulation of MAPK cascade<br>(GO:0043410)               | 15                    | CCL15, CCL2, CCL20, CCL22, CCL26, CCL4, CCL7, CCL8, IGF1, LIF, MIF, TGFB1, TGFB2, THPO, TNFA    | 520          | 22.85                  | 4.82E-15   |
| regulation of cell motility<br>(GO:2000145)                       | 15                    | CCL2, CCL20, CCL26, CCL4, CCL7, CCL8, CSF1, CXCL10, FGF6, FGF7, IGF1, MIF, TGFB1, TGFB2, TNFA   | 947          | 12.55                  | 1.43E-11   |
| positive regulation of cellular metabolic process<br>(GO:0031325) | 14                    | ANG, CSF1, CXCL10, FGF6, FGF7, GDNF, IGF1, IL5, LIF, MIF, TGFB1, TGFB2, THPO, TNFA              | 3238         | 3.42                   | 6.69E-04   |
| regulation of protein phosphorylation<br>(GO:0001932)             | 13                    | ANG, CSF1, FGF6, FGF7, IGF1, IL5, IL7, LIF, MIF, TGFB1, TGFB2, THPO, TNFA                       | 1210         | 9.16                   | 5.80E-09   |
| neutrophil chemotaxis<br>(GO:0030593)                             | 13                    | CCL15, CCL2, CCL20, CCL22, CCL26, CCL4, CCL7, CCL8, CXCL1, CXCL10, CXCL2, CXCL3, TGFB2          | 77           | > 100                  | 6.61E-21   |
| leukocyte chemotaxis<br>(GO:0030595)                              | 13                    | CCL15, CCL2, CCL20, CCL22, CCL26, CCL4, CCL7, CCL8, CXCL1, CXCL10, CXCL2, CXCL3, TGFB2          | 141          | 73.03                  | 1.56E-18   |
| lymphocyte chemotaxis<br>(GO:0048247)                             | 9                     | CCL15, CCL2, CCL20, CCL22, CCL26, CCL4, CCL7, CCL8, CXCL10                                      | 49           | > 100                  | 8.53E-15   |
| <b>GO molecular function</b>                                      | <b>cytokine count</b> | <b>mapped ID</b>                                                                                | <b>genes</b> | <b>fold enrichment</b> | <b>FDR</b> |
| growth factor activity<br>(GO:0008083)                            | 13                    | CSF1, CXCL1, FGF6, FGF7, GDNF, IGF1, IL5, IL7, LIF, MIF,                                        | 163          | 58.32                  | 3.96E-16   |

|                                                       |                   | TGFB1, TGFB2,<br>THPO                                                                                                                                                                       |       |                    |              |
|-------------------------------------------------------|-------------------|---------------------------------------------------------------------------------------------------------------------------------------------------------------------------------------------|-------|--------------------|--------------|
| G protein-coupled<br>receptor binding<br>(GO:0001664) | 12                | CCL15, CCL2,<br>CCL20, CCL22,<br>CCL26, CCL4, CCL7,<br>CCL8, CXCL1,<br>CXCL10, CXCL2,<br>CXCL3                                                                                              | 294   | 32.33              | 3.20E-<br>13 |
| CCR chemokine<br>receptor binding<br>(GO:0048020)     | 8                 | CCL15, CCL2,<br>CCL20, CCL22,<br>CCL26, CCL4, CCL7,<br>CCL8                                                                                                                                 | 45    | > 100              | 6.56E-<br>13 |
| CCR2 chemokine<br>receptor binding<br>(GO:0031727)    | 2                 | CCL2, CCL7                                                                                                                                                                                  | 5     | > 100              | 7.63E-<br>03 |
| GO cellular<br>component                              | cytokine<br>count | mapped ID                                                                                                                                                                                   | genes | fold<br>enrichment | FDR          |
| extracellular space<br>(GO:0005615)                   | 26                | ANG, CCL2, CCL4,<br>CCL7, CCL8, CCL15,<br>CCL20, CCL22,<br>CCL26, CSF1,<br>CXCL1, CXCL2,<br>CXCL3, CXCL10,<br>FGF6, FGF7, GDNF,<br>IGF1, IL5, IL7, LIF,<br>MIF, TGFB1, TGFB2,<br>THPO, TNFA | 3391  | 6.07               | 9.30E-<br>18 |
| secretory granule<br>lumen (GO:0034774)               | 5                 | CXCL1, IGF1, MIF,<br>TGFB1, TGFB2                                                                                                                                                           | 321   | 12.34              | 3.19E-<br>02 |
| cytoplasmic vesicle<br>lumen (GO:0060205)             | 5                 | CXCL1, IGF1, MIF,<br>TGFB1, TGFB2                                                                                                                                                           | 325   | 12.19              | 2.54E-<br>02 |
| platelet alpha<br>granule lumen<br>(GO:0031093)       | 3                 | IGF1, TGFB1, TGFB2                                                                                                                                                                          | 67    | 35.47              | 3.06E-<br>02 |

**Supplementary Table S2.** GO enrichment analysis on gene sets generated from the list of 26 cytokines selected from the antibody-based array analysis. The “cytokine count” column indicates the number of cytokine genes assigned to the corresponding GO term.

| pathway                                                     | count | p-value | gene ID                                                                              |
|-------------------------------------------------------------|-------|---------|--------------------------------------------------------------------------------------|
| R-HSA-449147_Signaling by interleukins                      | 14    | 0.0687  | TNF, MIF, CCL20, TGFB1, CXCL1, CXCL2, CSF1, CCL22, CCL4, IL7, IL5, CCL2, CXCL10, LIF |
| R-HSA-6783783_Interleukin-10 signaling                      | 10    | 0.0206  | TNF, CCL20, CXCL1, CXCL2, CSF1, CCL22, CCL4, CCL2, CXCL10, LIF                       |
| Reactome_Interleukin-10 signaling                           | 10    | 0.0206  | TNF, CCL20, CXCL1, CXCL2, CSF1, CCL22, CCL4, CCL2, CXCL10, LIF                       |
| Boquest_Stem cell cultured vs fresh_up                      | 9     | 0.0003  | ANG, TGFB2, CXCL1, CXCL2, CXCL3, IGF1, CCL8, CCL2, CXCL10                            |
| Sana_TNF signaling_up                                       | 8     | 0.0062  | CCL7, CCL20, CXCL2, CXCL3, CSF1, CCL8, CCL2, CXCL10                                  |
| Lindstedt_Dendritic cell maturation A                       | 8     | 0.0234  | TNF, CCL20, CXCL1, CXCL2, CCL8, CCL4, CCL2, CXCL10                                   |
| Phong_TNF response via p38 partial                          | 6     | 0.0211  | TGFB2, CCL20, CXCL1, CXCL2, CXCL3, LIF                                               |
| KRAS600 lung breast up.V1_up                                | 6     | 0.0910  | CXCL2, CXCL3, LIF, CXCL1, CCL20, CCL22                                               |
| Seki_Inflammatory response LPS_up                           | 5     | 0.0094  | CCL7, CSF1, CCL2, CXCL10, LIF                                                        |
| BMI1 down.V1_up                                             | 5     | 0.0094  | TGFB2, CCL20, CXCL1, CSF1, LIF                                                       |
| STK33 up                                                    | 5     | 0.0535  | TNF, CXCL1, CXCL2, CXCL3, CCL4                                                       |
| EGFR up.V1_up                                               | 4     | 0.0289  | TGFB2, CCL22, CCL2, LIF                                                              |
| MEL18 down.V1_up                                            | 4     | 0.0679  | TGFB2, CXCL1, CSF1, LIF                                                              |
| R-HSA-202733_Cell surface interactions at the vascular wall | 2     | 0.0910  | MIF, TGFB1                                                                           |
| MTOR up.V1_down                                             | 2     | 0.0910  | CXCL1, IGF1                                                                          |
| VEGFA up.V1_up                                              | 2     | 0.0910  | CCL7, CCL2                                                                           |

**Supplementary Table S3.** Functional enrichment analysis of the selected 26 cytokines in the biological process category. The “count” column indicates the number of cytokine genes assigned to the corresponding GO term.

| Pathway                                                    | Gene Set                                                                                    | p-value |
|------------------------------------------------------------|---------------------------------------------------------------------------------------------|---------|
| KEGG_NOD_like_receptor_signalling_pathway                  | CCL2, IL6, HSP90B1, HSP90AB1, HSP90AA1                                                      | 0.0007  |
| Bystrykh_hematopoiesis_stem_cell_SCP2_qtl_trans            | HSP90AB1, PSMD3, SPARC                                                                      | 0.0013  |
| Gryder_PAX3FOXO1_top_enhancers                             | AP1B1, MCFD2, RCN1, YWHAZ, ACTG1, TBCA, UBAC2, GNL3L, PFDN4, GART, EWSR1, PXDN, NACA, APPL1 | 0.0014  |
| Kyng_dna_damage_dn                                         | ACTN4, PRKACA, CAB39, PRMT1, TPM1, FN1, SEMA3B, SERPINE2, PSG1, TBCA, LOX, NRP2             | 0.0024  |
| Pid_PI3KCI_akt_pathway                                     | PRKACA, YWHAH, YWHAZ, HSP90AA1                                                              | 0.0038  |
| Stearman_lung_cancer_early_vs_late_up                      | SF3B1, RCN1, ACTN4, PRMT1, NME3, HNRNPH1, EIF3M                                             | 0.0039  |
| Pid_LKB1_pathway                                           | PRKACA, CAB39, YWHAH, YWHAZ, HSP90AA1                                                       | 0.0041  |
| Cadwell_ATG16L1_targets_up                                 | APOA1, BST1, HBA1, C1QTNF1, TF                                                              | 0.0041  |
| Faelt_b_cll_with_vh_rearrangements_up                      | NPC2, CAPZA2, HNRNPA3                                                                       | 0.0049  |
| Altemeier_response_to_LPS_with_mechanical_ventilation      | SERPINE1, CCL2, BST1, IL6, OSMR                                                             | 0.0064  |
| Turashvili_breast_lobular_carcinoma_vs_ductal_normal_up    | COMP, FN1, POSTN, LOX, ADAM12, COL12A1, SPARC                                               | 0.0071  |
| Croonquist_stromal_stimulation_up                          | SERPINE1, IL6, BASP1, IGFBP4, LOX, TMSB4X, SPARC                                            | 0.0071  |
| PID_reg_gr_pathway                                         | PRKACA, IL6, YWHAH, HSP90AA1, FGG                                                           | 0.0095  |
| Moreira_response_to_TSA_up                                 | YWHAH, HSP90AB1, PA2G4, IGFBP4, TMSB4X                                                      | 0.0095  |
| Reactome_mTOR_signalling                                   | CAB39, EIF4G1, CAB39L                                                                       | 0.0112  |
| Reactome_interleukin_3_interleukin_5_and_GM_csf_signalling | PRKACA, YWHAZ, CRKL                                                                         | 0.0112  |
| Xu_GH1_autocrine_targets_dn                                | TPM1, IGFBP4, TMSB4X, MPRIP, NLN, PXDN, COL12A1                                             | 0.0119  |
| Biocarta_AKT_pathway                                       | YWHAH, HSP90AA1                                                                             | 0.0121  |
| Worschech_tumor_evasion_and_tolerogenicity_up              | CCL2, IL6                                                                                   | 0.0121  |
| Turashvili_breast_lobular_carcinoma_vs_lobular_normal_dn   | COMP, FN1, POSTN, LOX, ADAM12, COL12A1, NACA                                                | 0.0150  |

**Supplementary Table S4. List of significant protein sets from CAF-200 secretome associated with biological reactions.** As identified by enrichment analysis of differentially expressed proteins using the Molecular Signatures Database (MSigDB) of the GSEA software (Broad Institute).

**A**

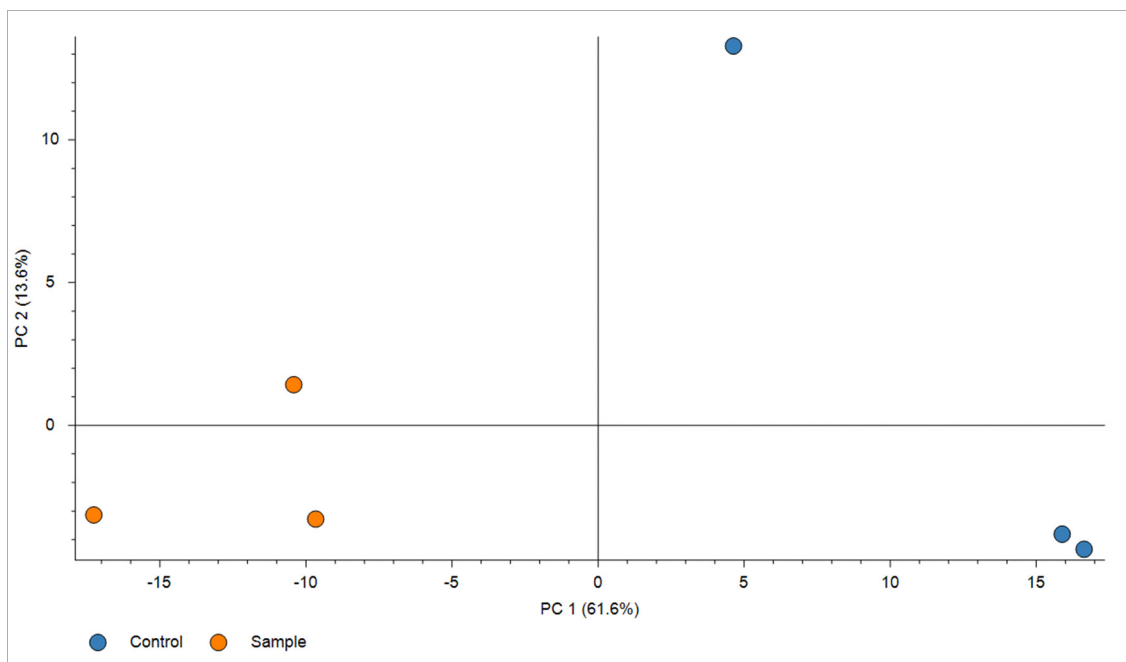

**B**

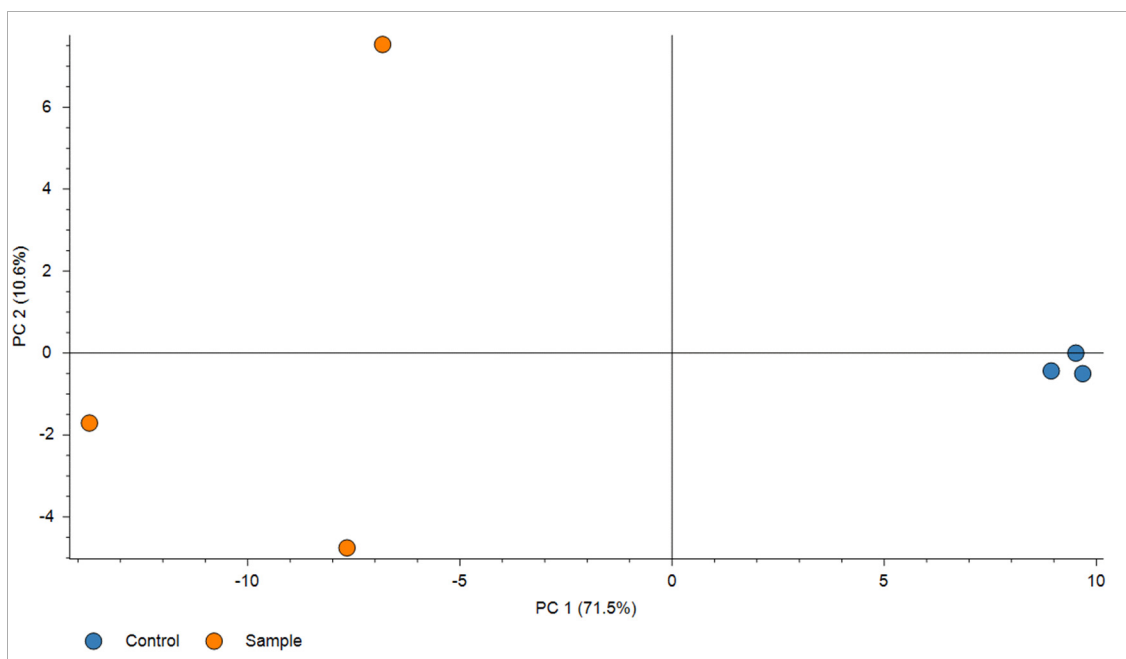

**Supplementary Figure S1.** Principal component analyses of CAF-200 secretome replicates: CAF-200 CM-control (non-treated) and CAF-200 CM-samples (treated with

trastuzumab plus pertuzumab plus docetaxel regimen) by LC-MS/MS analyses in pairwise comparisons. **A.** Graph PC1&PC2 shows grouping by condition treatment replicates and segregation among proteins identified with  $p\text{-value} < 0.05$ . **B.** Graph PC1&PC2 shows grouping by condition treatment replicates and segregation among proteins with Abundance Ratio Variabilities = 0%.



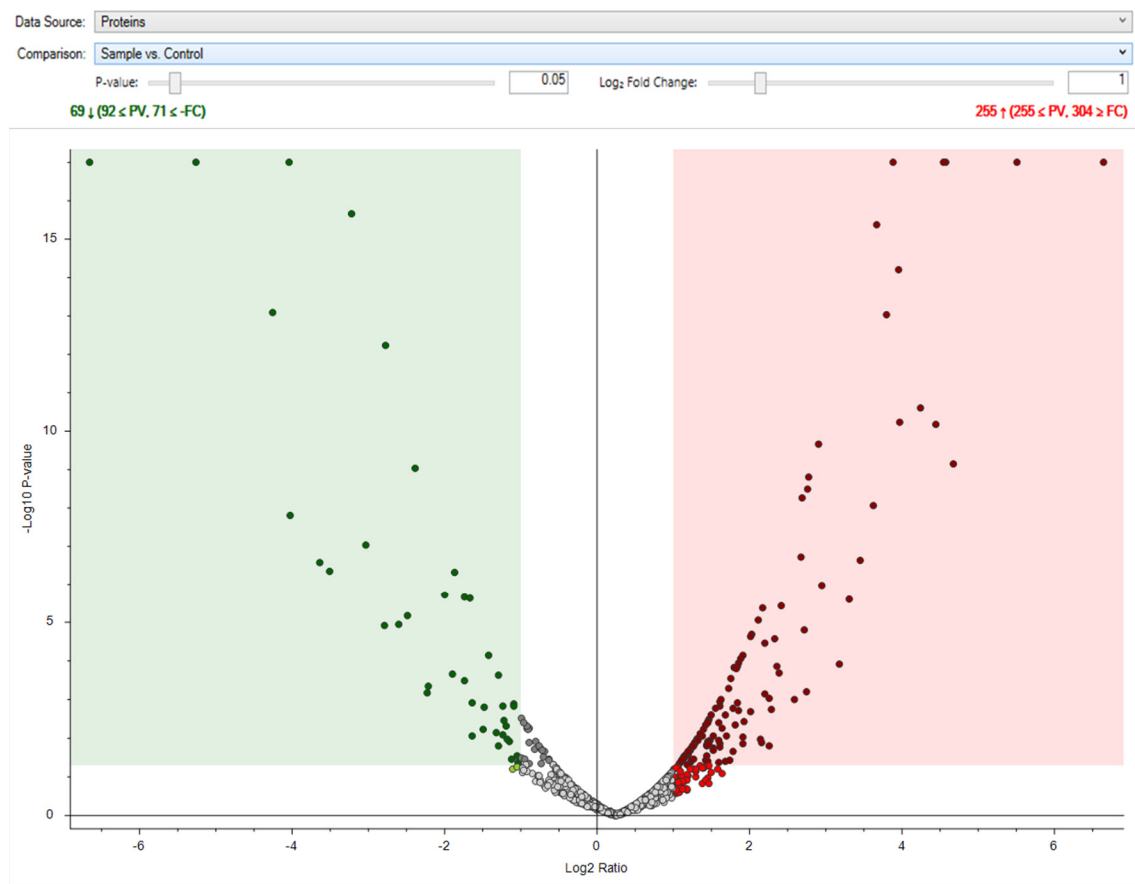

**Supplementary Figure S2.** Volcano plot analysis.

A

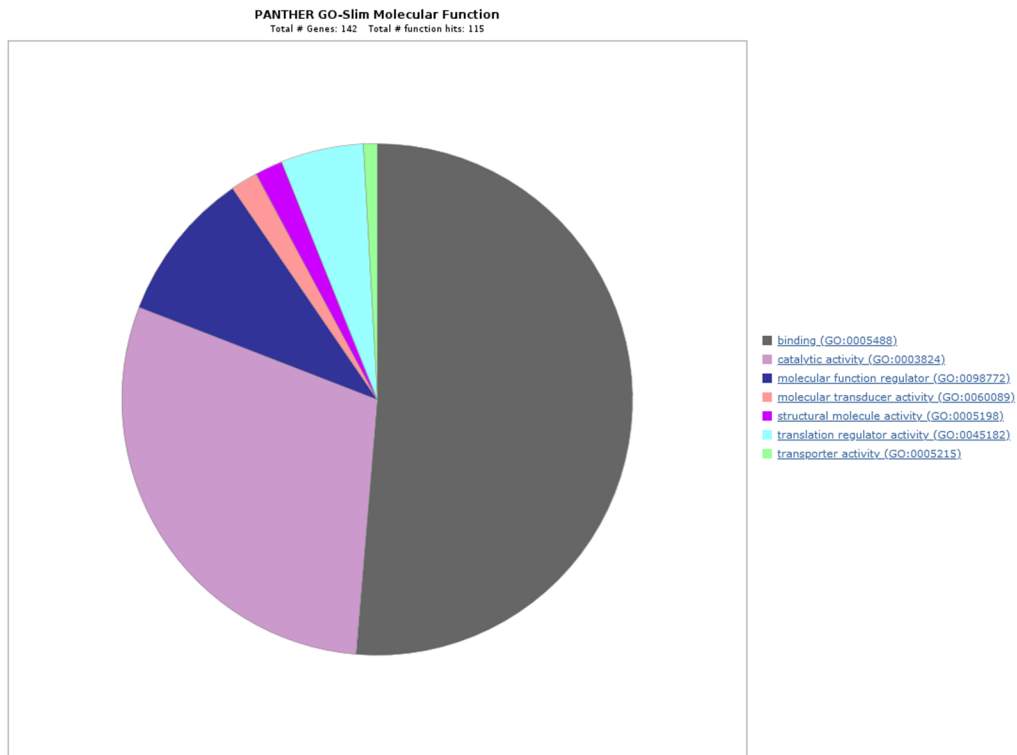

B

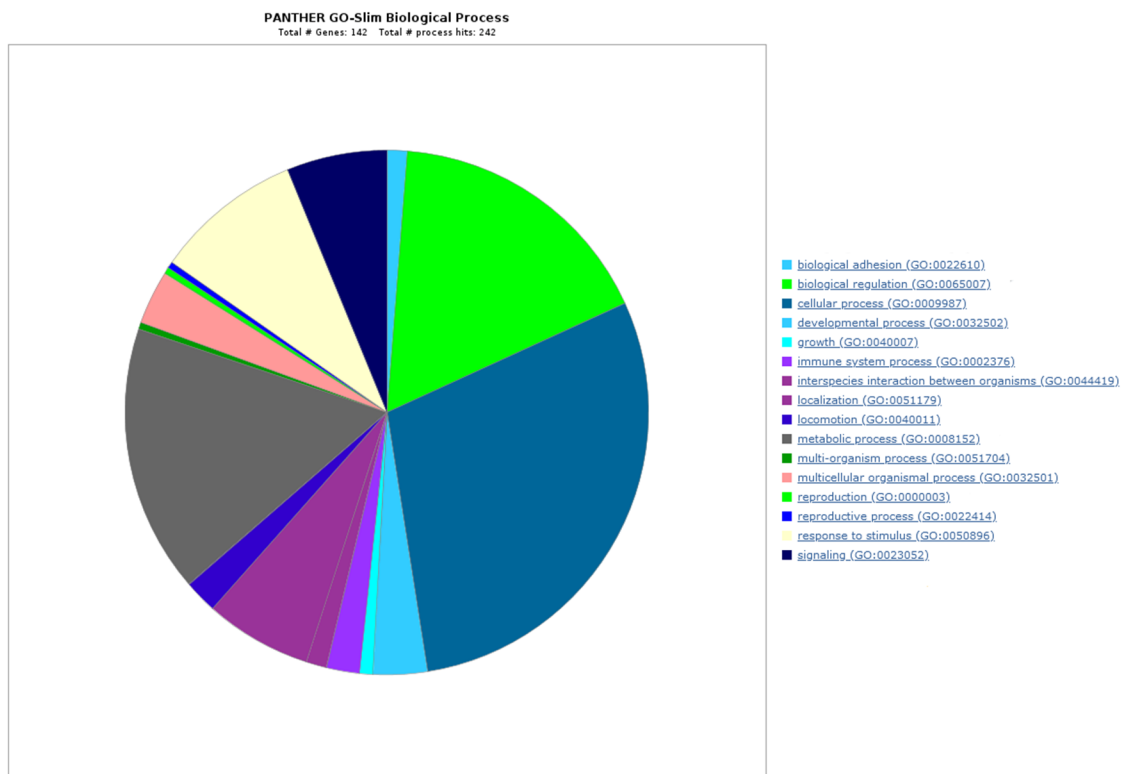

C

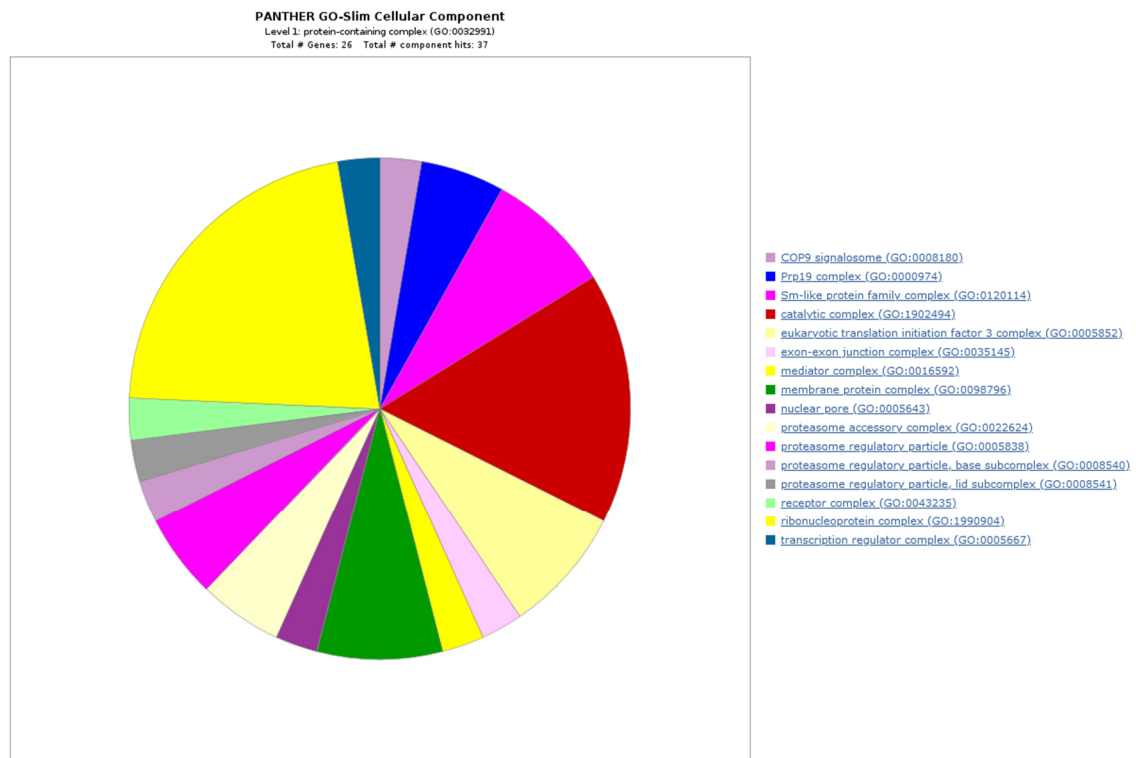

D

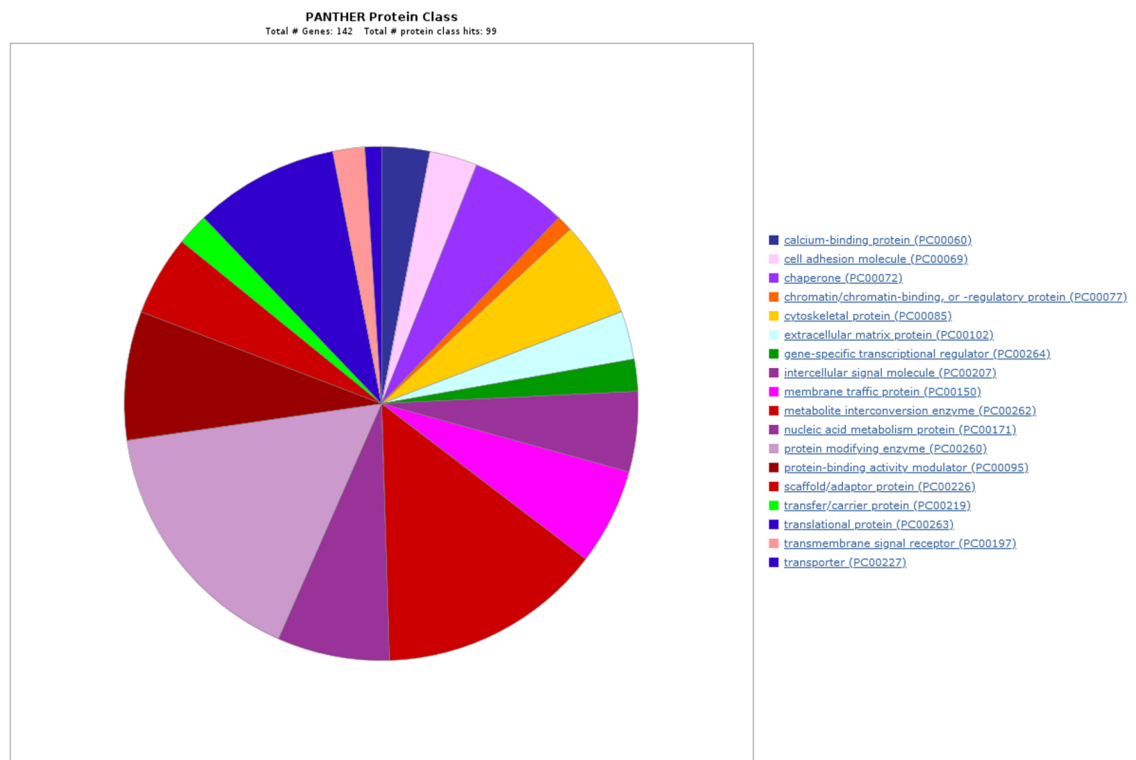

E

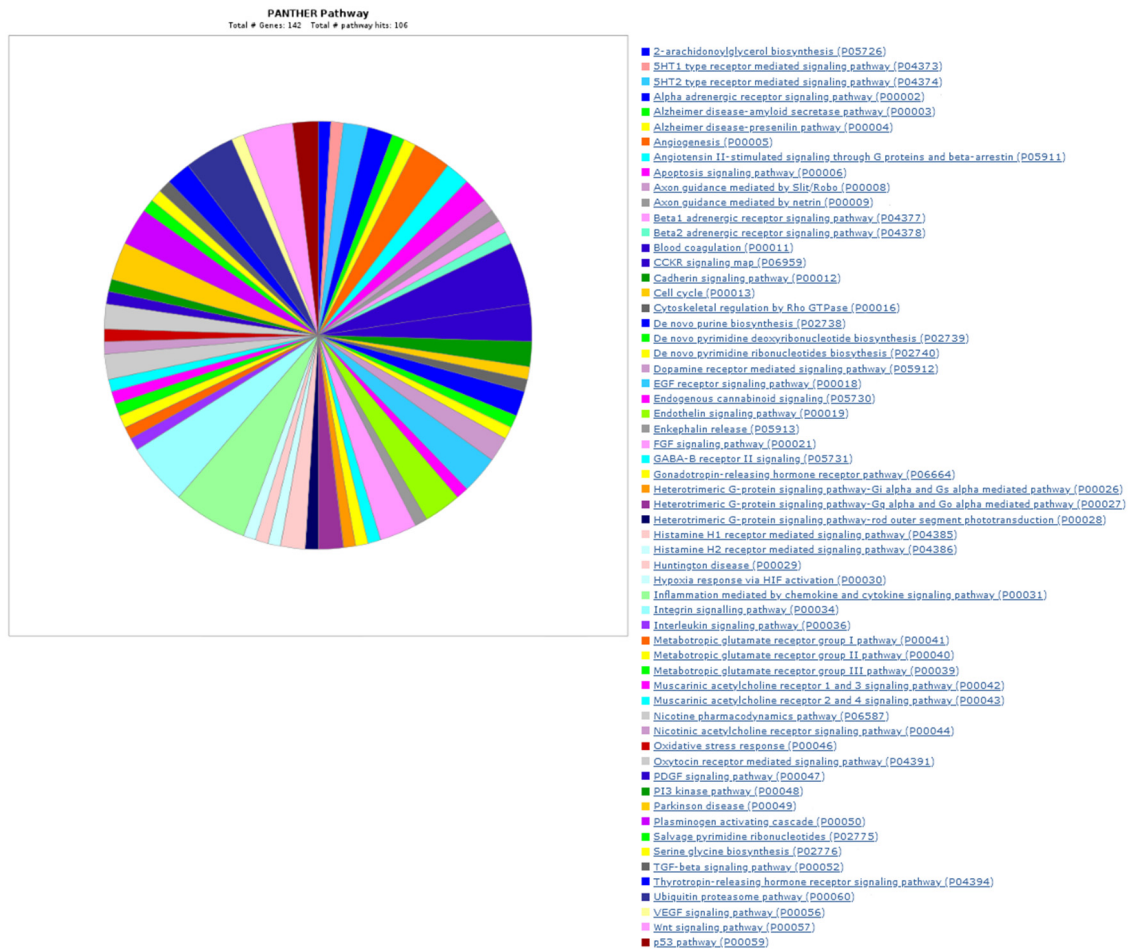

**Supplementary Figure S3.** GO-based functional annotation of candidate proteins. The list of 145 proteins was analysed for: **A.** Molecular function; **B.** Biological process; **C.** Cellular component; **D.** Protein class and **E.** Pathway.

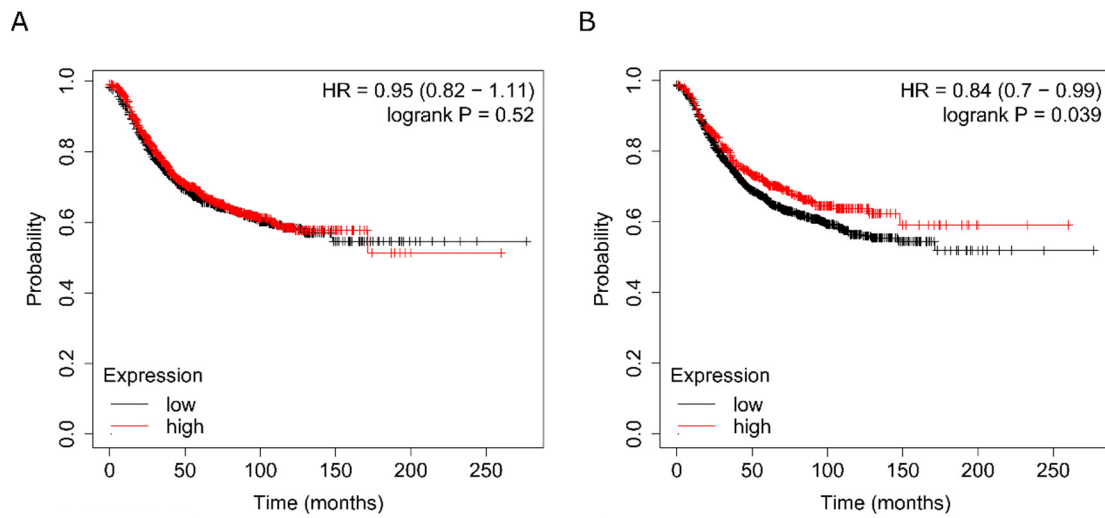

**Supplementary Figure S4.** RFS plots of molecular signatures assembled with: **A.** Eighty cytokines from the antibody arrays and **B.** Proteins with inverse abundance ratios from MS-MS discovery assays in the CAF-200 secretome.

**A. Figure 2.**

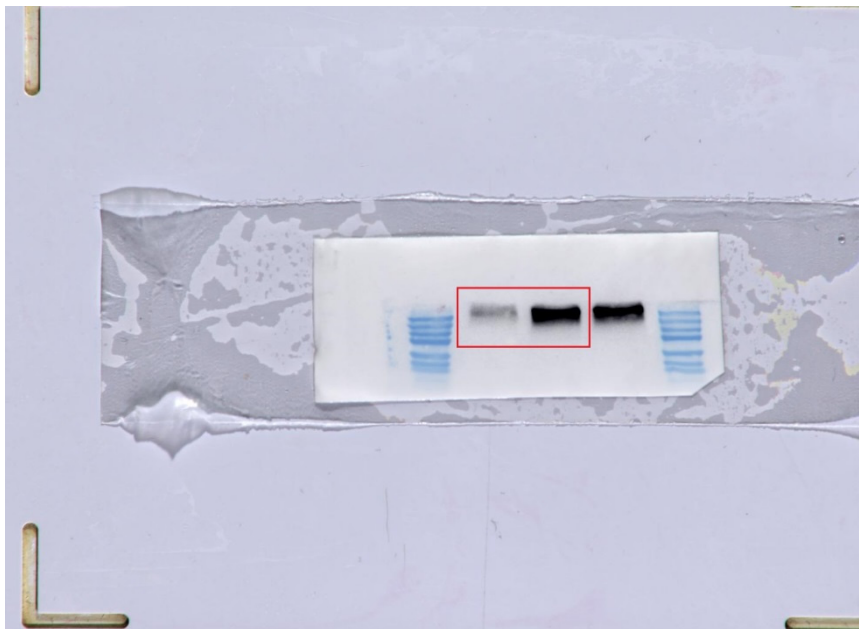

Fibronectin.

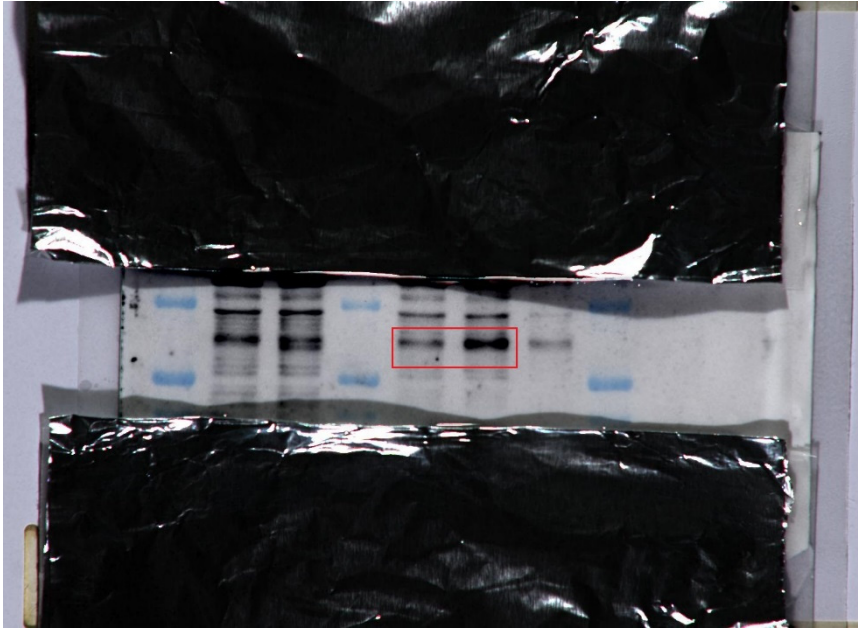

Snail.

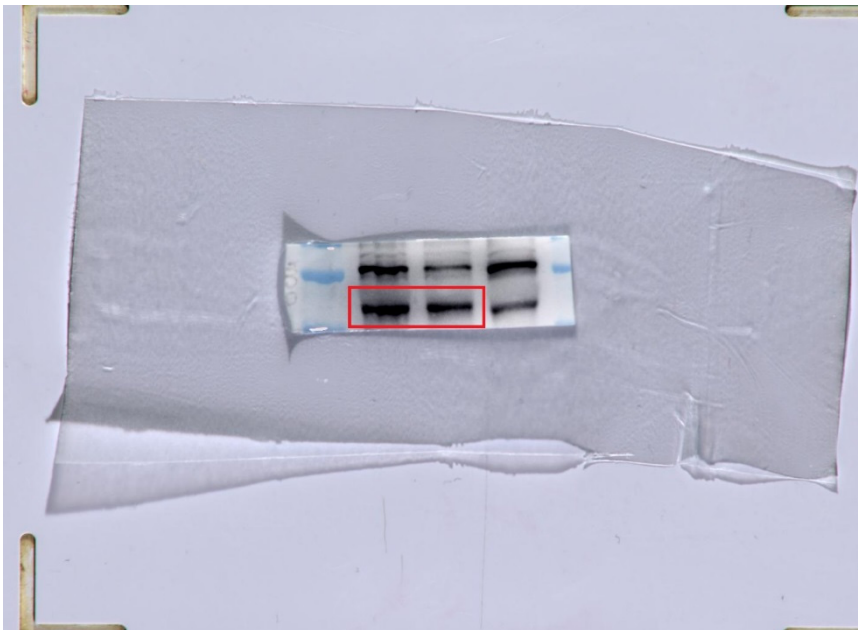

Occludin.

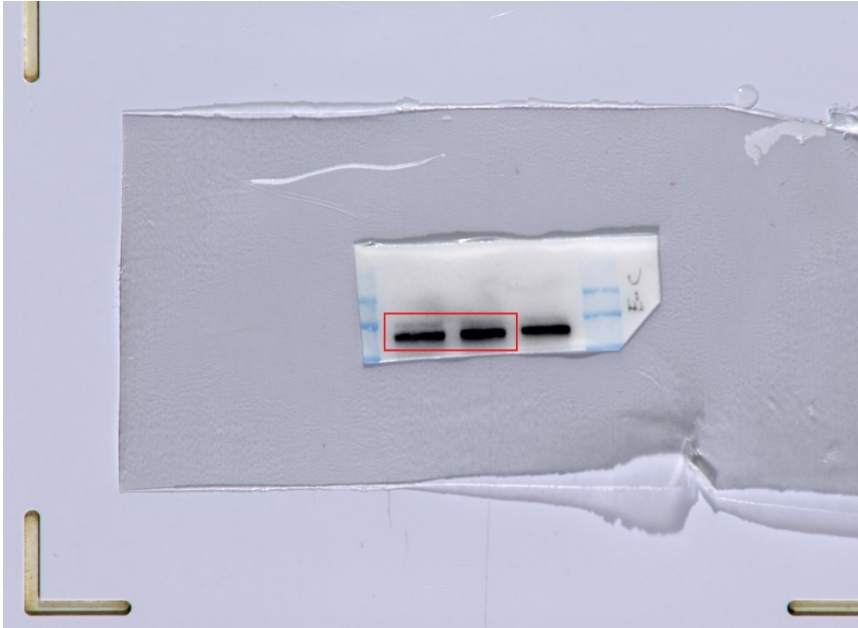

E-cadherin.

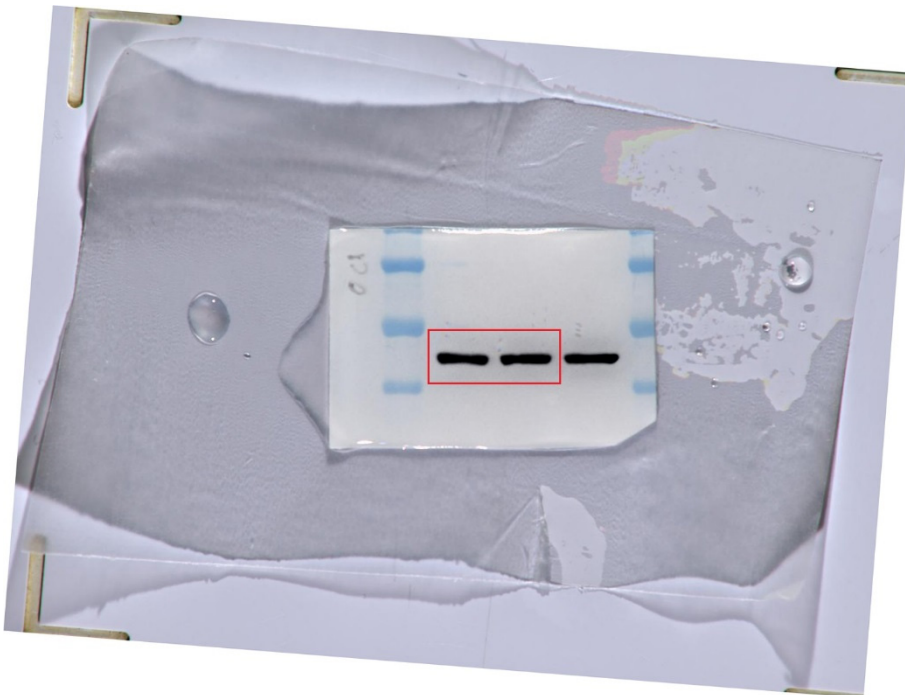

$\beta$ -actin.

**B. Figure 3.**



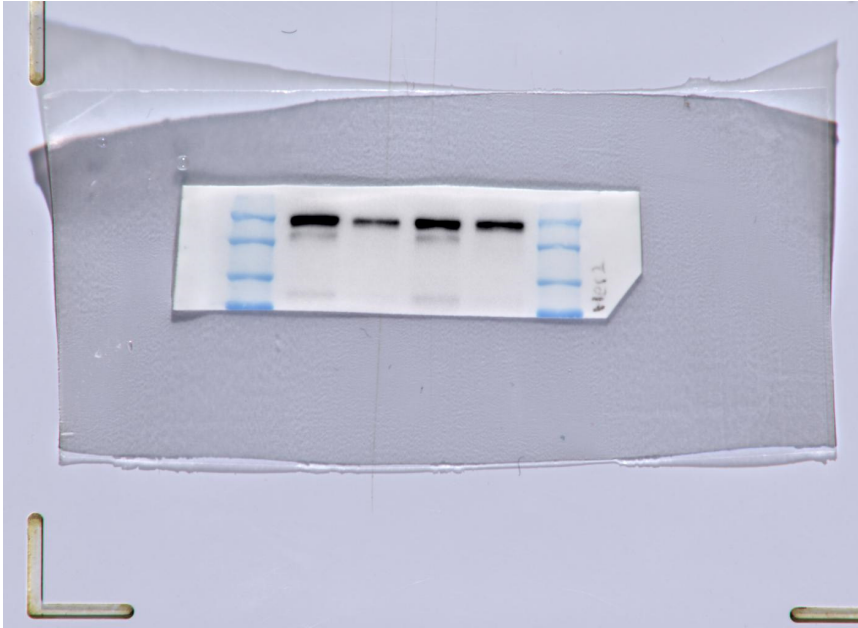

HER2.

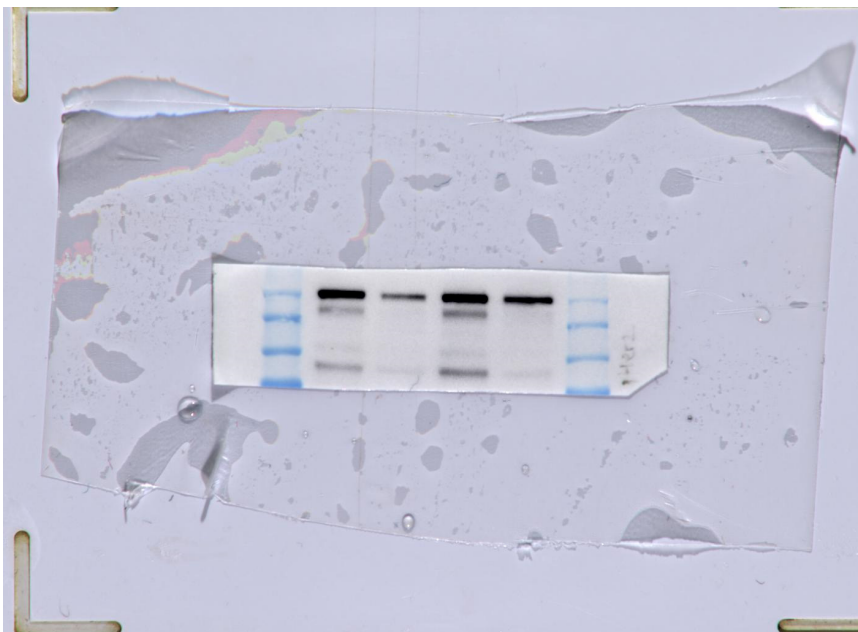

pHER2.



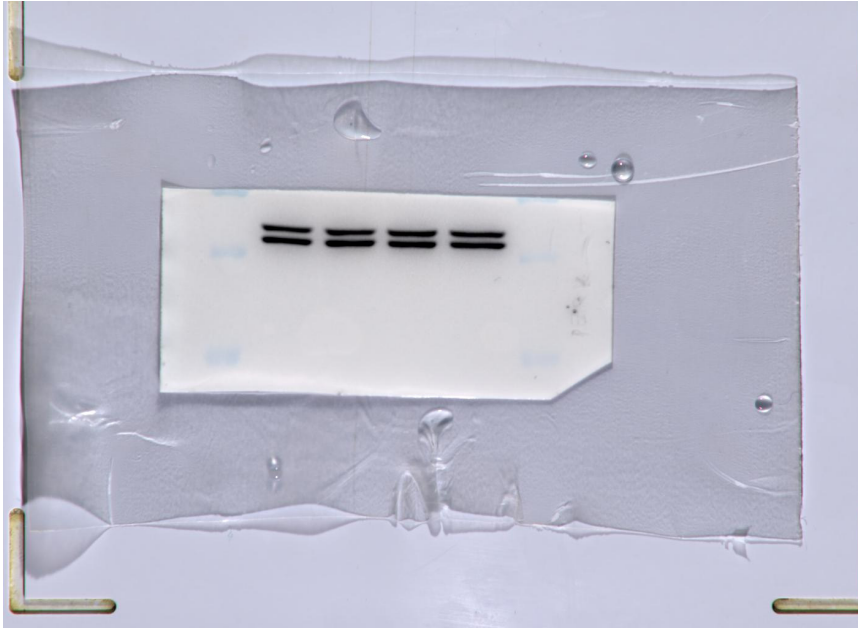

ERK.

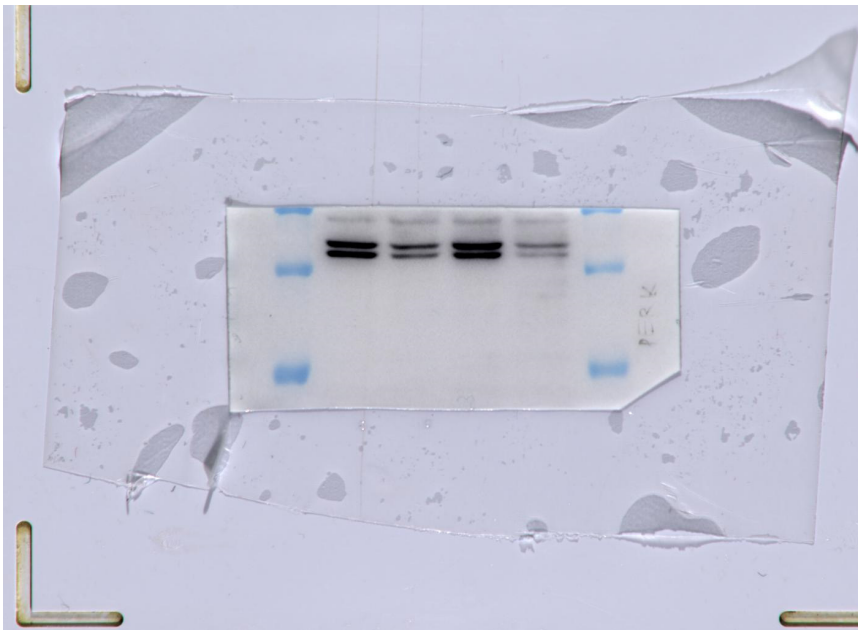

pERK.

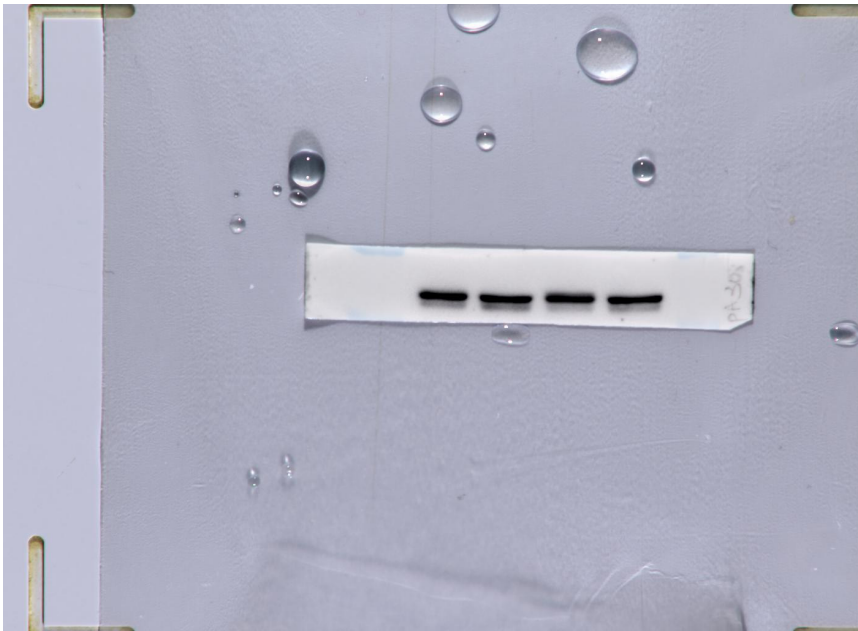

AKT.

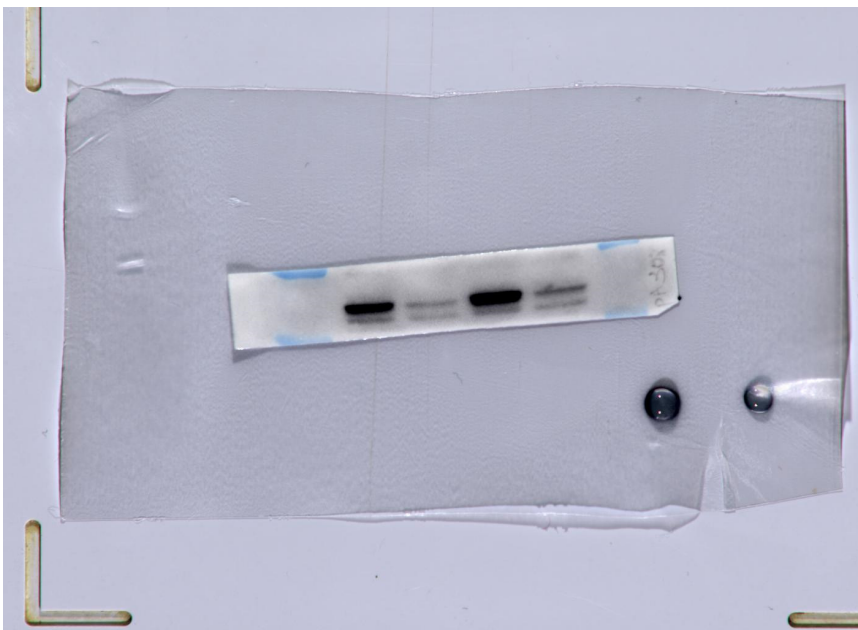

pAKT(Thr308).

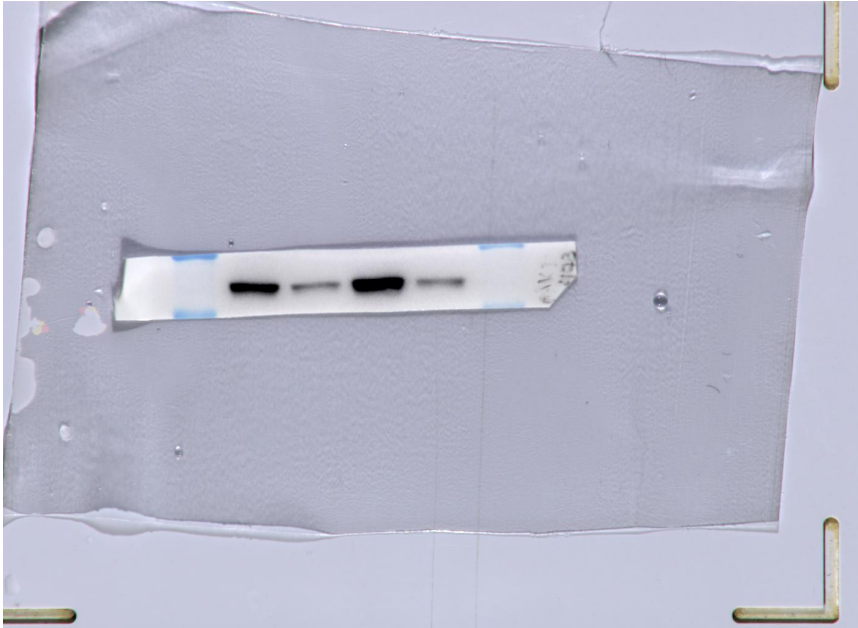

pAKT(Ser473).

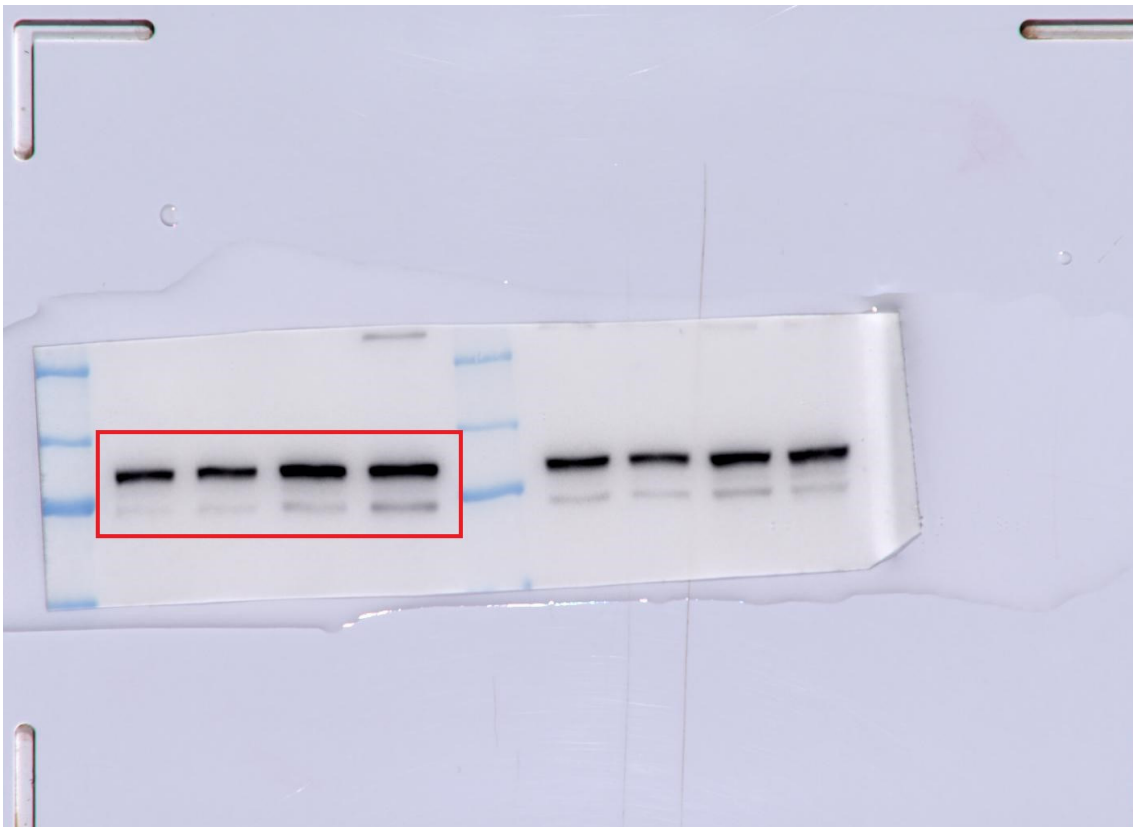

STAT3.

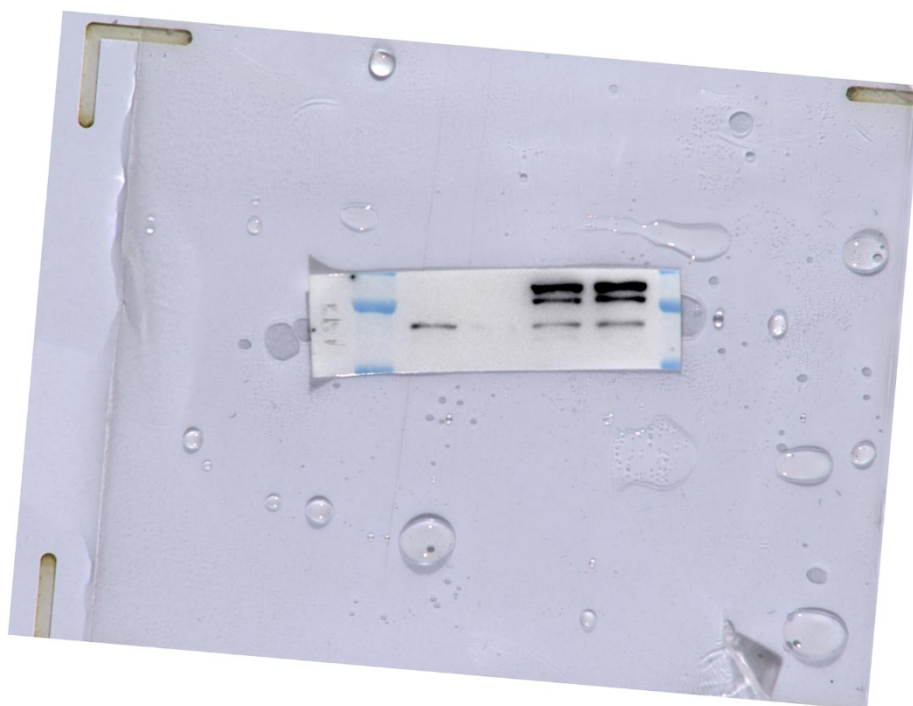

pSTAT3.

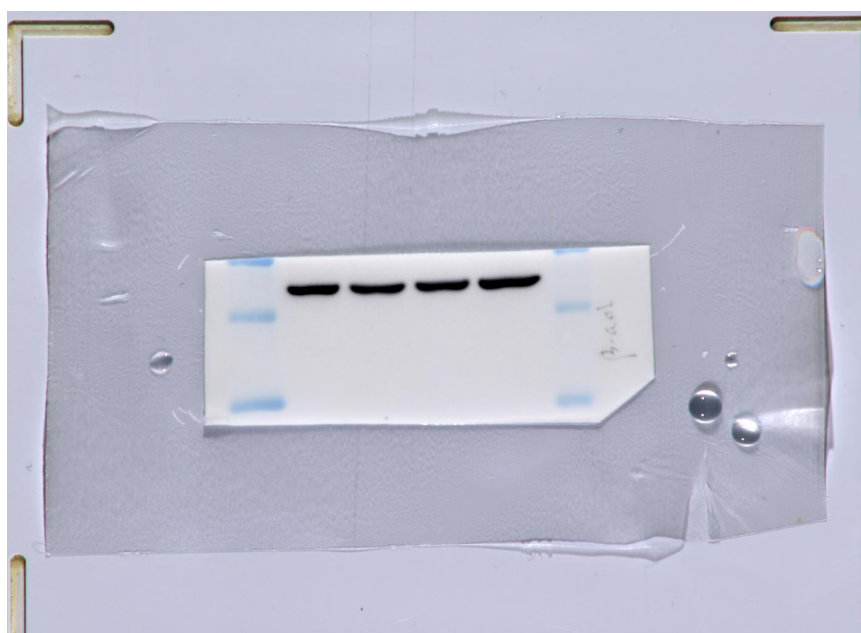

β-actin.

**Supplementary Figure S5.** Uncropped WB images.
